# Supplementary material
Source: HighWire-hosted journal article supplement (https://www.annfammed.org/highwire/filestream/14087/field_highwire_adjunct_files/0/Supplemental_Table.pdf)
Supplement: Supplemental_Table.pdf [file Supplemental_Table.pdf]

**Supplementary Table 1.** The number of total and new cases of cardiovascular diseases, chronic non-cardiovascular diseases, mental disorders, health problems and cancer diseases during the period from 2017 to 2020. At-risk population is taken as total population minus the number of people who have already developed the disease of interest (total cases – new cases).

| Variables                                       | 2017        |           | 2018        |           | 2019        |           | 2020        |           |
|-------------------------------------------------|-------------|-----------|-------------|-----------|-------------|-----------|-------------|-----------|
|                                                 | Total cases | New cases |
| <b>Total population</b>                         | 56,982      |           | 58,961      |           | 60,154      |           | 63,402      |           |
| Women                                           | 33,327      |           | 34,540      |           | 35,112      |           | 36,391      |           |
| Men                                             | 23,655      |           | 24,421      |           | 25,042      |           | 27,011      |           |
| <b>Cardiovascular risk factors and diseases</b> |             |           |             |           |             |           |             |           |
| Hypercholesterolemia                            | 16,838      | 699       | 17,011      | 677       | 17,334      | 771       | 17,986      | 495       |
| Hypertension                                    | 14,906      | 600       | 15,421      | 627       | 15,959      | 598       | 16,803      | 388       |
| Type 2 diabetes                                 | 4,395       | 323       | 4,574       | 348       | 4,794       | 374       | 5,160       | 230       |
| Chronic kidney disease                          | 1,501       | 378       | 1,850       | 306       | 2,135       | 411       | 2,700       | 222       |
| Heart failure                                   | 467         | 122       | 519         | 174       | 607         | 198       | 848         | 159       |
| Stroke                                          | 641         | 105       | 615         | 130       | 573         | 104       | 602         | 117       |
| Ischemic cardiomyopathy                         | 985         | 182       | 1,139       | 129       | 1,251       | 132       | 1,434       | 82        |
| Acute myocardial infarction                     | 535         | 56        | 433         | 56        | 280         | 52        | 319         | 72        |
| <b>Chronic non-cardiovascular diseases</b>      |             |           |             |           |             |           |             |           |
| Dementia                                        | 2,898       | 340       | 2,889       | 418       | 3,005       | 556       | 3,246       | 410       |
| Asthma                                          | 3,673       | 286       | 3,841       | 381       | 4,098       | 320       | 4,530       | 300       |
| Benign prostatic hypertrophy                    | 3,055       | 490       | 3,471       | 517       | 3,885       | 468       | 4,522       | 324       |
| Hypothyroidism/thyroiditis                      | 4,844       | 388       | 5,143       | 397       | 5,449       | 437       | 5,926       | 235       |
| Osteoporosis                                    | 4,505       | 308       | 4,721       | 268       | 4,921       | 320       | 5,275       | 193       |
| Chronic obstructive pulmonary disease           | 1,468       | 152       | 1,562       | 158       | 1,690       | 189       | 1,905       | 90        |
| <b>Mental disorders and health problems</b>     |             |           |             |           |             |           |             |           |
| Anxiety                                         | 11,566      | 1,118     | 12,397      | 1,261     | 13,426      | 1,563     | 15,993      | 1,564     |
| Depression                                      | 7,040       | 347       | 7,239       | 367       | 7,507       | 403       | 8,068       | 346       |
| Alcohol use disorder                            | 1,150       | 74        | 1,141       | 89        | 1,161       | 105       | 1,196       | 52        |
| Violence against women                          | 80          | 35        | 112         | 27        | 133         | 31        | 198         | 33        |

**Cancer diseases**

|                            |       |     |       |     |       |     |       |     |
|----------------------------|-------|-----|-------|-----|-------|-----|-------|-----|
| Breast cancer              | 1,267 | 116 | 1,361 | 89  | 1,432 | 105 | 1,582 | 85  |
| Colon cancer               | 484   | 37  | 512   | 56  | 563   | 39  | 627   | 43  |
| Benign tumors of the colon | 1,704 | 320 | 2,017 | 405 | 2,411 | 306 | 2,910 | 213 |
| Prostate cancer            | 688   | 75  | 758   | 74  | 827   | 70  | 942   | 59  |
| Lung cancer                | 133   | 31  | 163   | 25  | 185   | 36  | 257   | 47  |
| Bladder cancer             | 328   | 39  | 364   | 44  | 407   | 52  | 490   | 42  |
| Liver cancer               | 21    | 5   | 26    | 12  | 37    | 5   | 44    | 7   |
| Thyroid cancer             | 110   | 19  | 126   | 7   | 133   | 19  | 153   | 6   |
| Melanoma                   | 292   | 39  | 325   | 40  | 362   | 48  | 424   | 25  |
| Stomach cancer             | 45    | 7   | 51    | 4   | 53    | 8   | 64    | 7   |
| Kidney cancer              | 159   | 26  | 182   | 19  | 197   | 34  | 242   | 17  |
| Lymphoma/Leukemia          | 56    | 6   | 61    | 6   | 67    | 8   | 85    | 11  |

---

**Supplemental materials for**

Sisó-Almirall A, Kostov B, Sánchez E, Benavent-Àreu J, González-de Paz L. Impact of the COVID-19 Pandemic on Primary Health Care Disease Incidence Rates: 2017 to 2020. *Ann Fam Med*. 2021. Online ahead of print. <https://doi.org/10.1370/afm.2731>.
